# Supplementary material for: Potential roles of neuronal nitric oxide synthase and the PTEN-induced kinase 1 (PINK1)/Parkin pathway for mitochondrial protein degradation in disuse-induced soleus muscle atrophy in adult rats
Source: PubMed Central journal article supplement (PMC7725317; doi:10.1371/journal.pone.0243660), 2020-12-09
Supplement: pone.0243660.s001.pdf [file pone.0243660.s001.pdf]

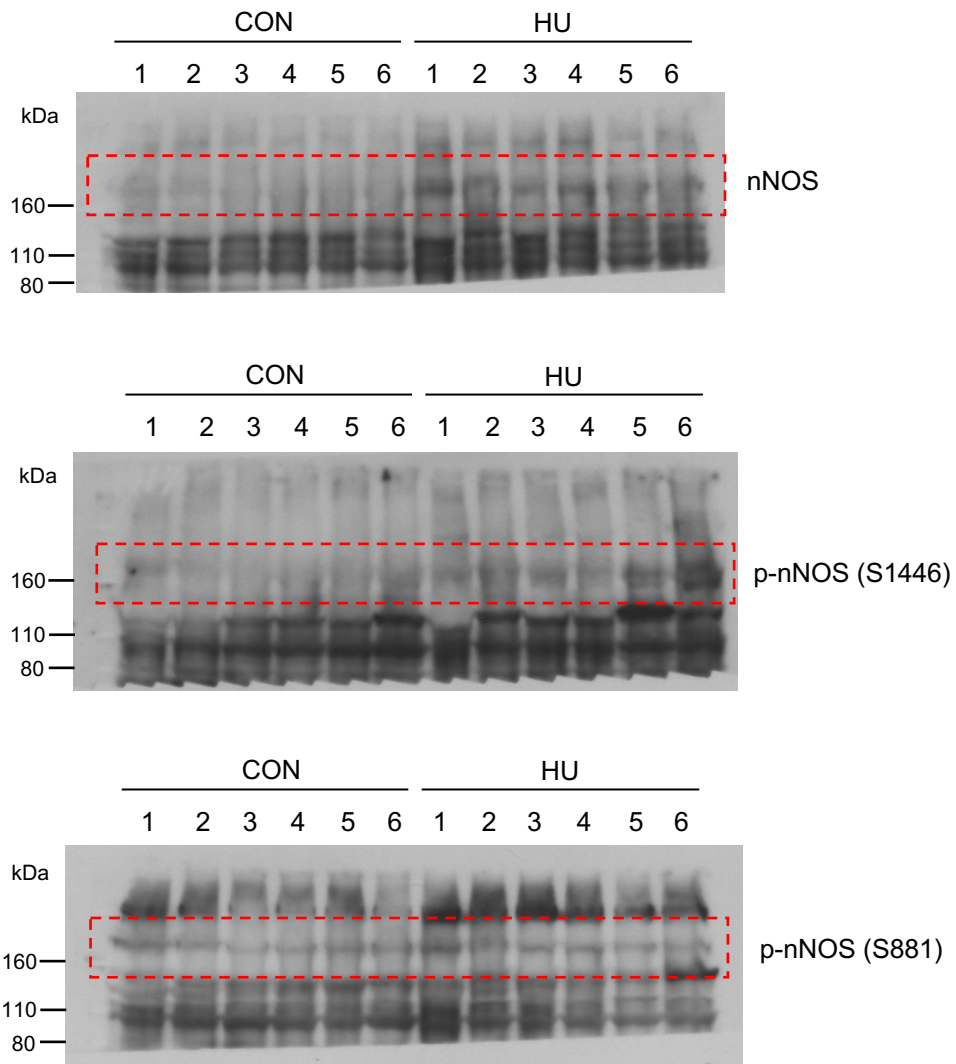

S1\_raw\_images. Original uncropped blots used in Fig. 2A.

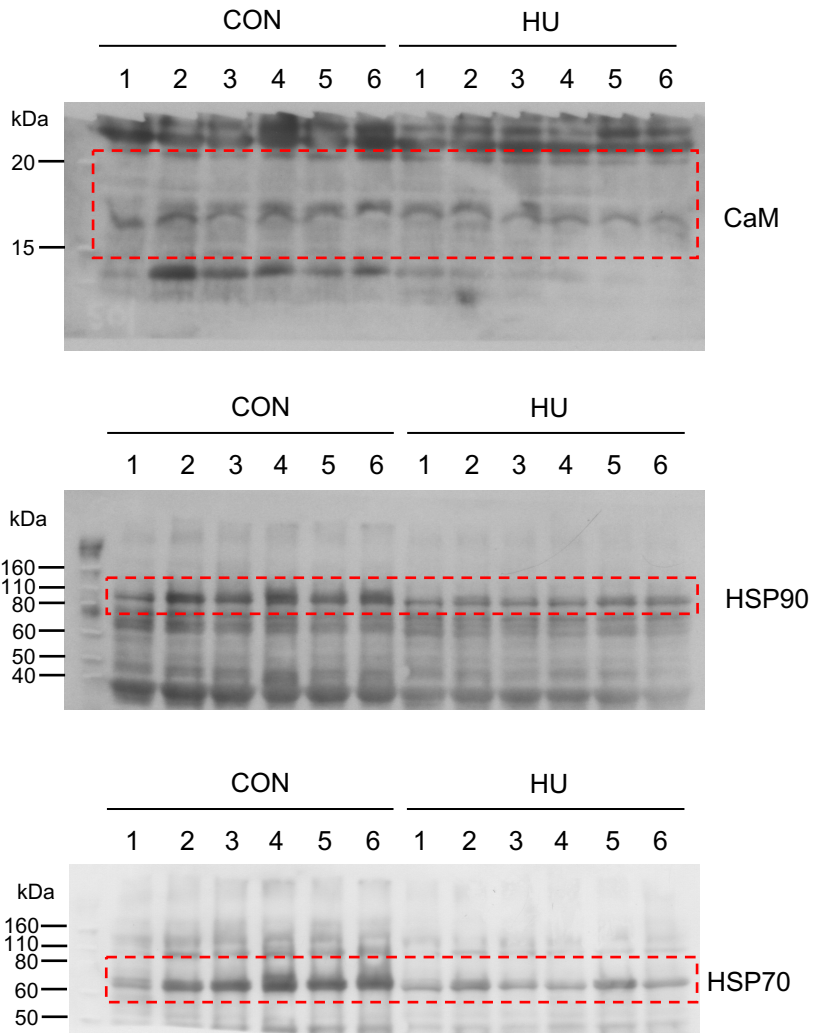

S1\_raw\_images. Original uncropped blots used in Fig. 3A.

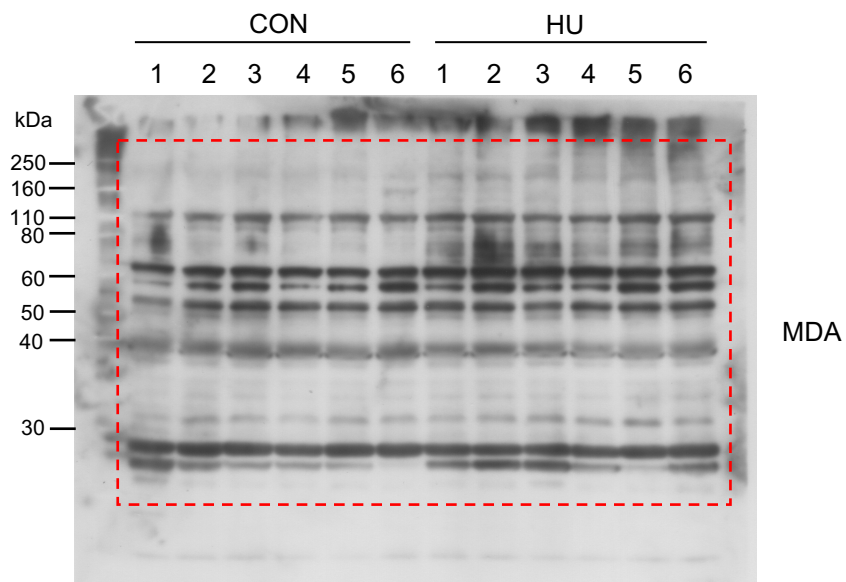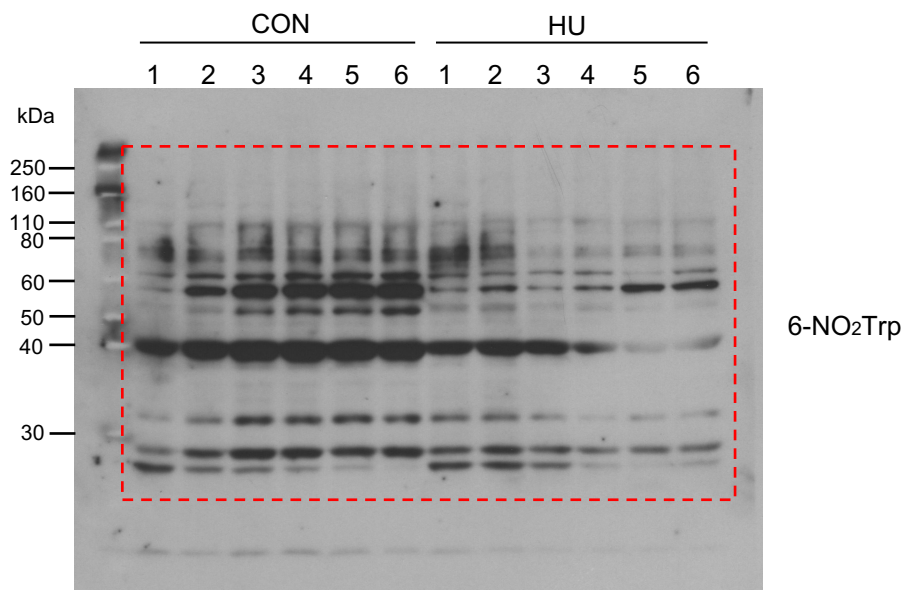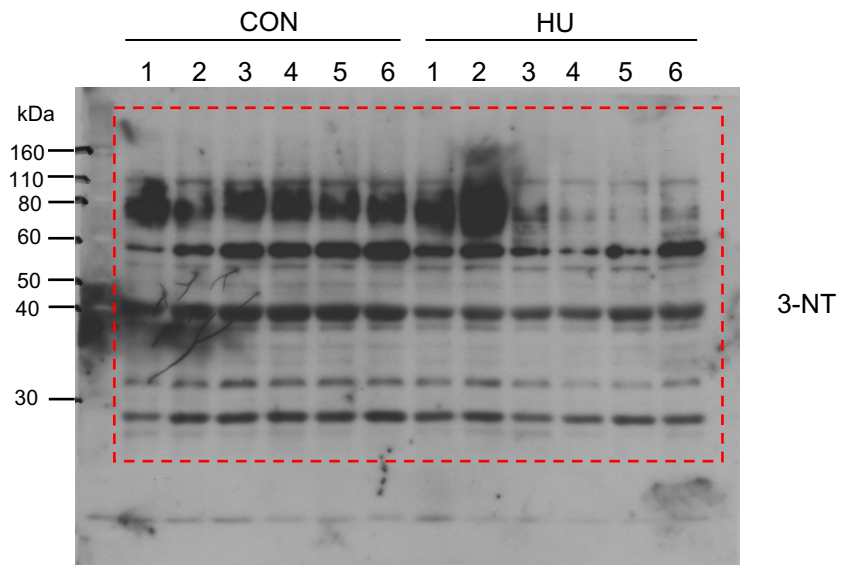

S1\_raw\_images. Original uncropped blots used in Fig. 4A-C.

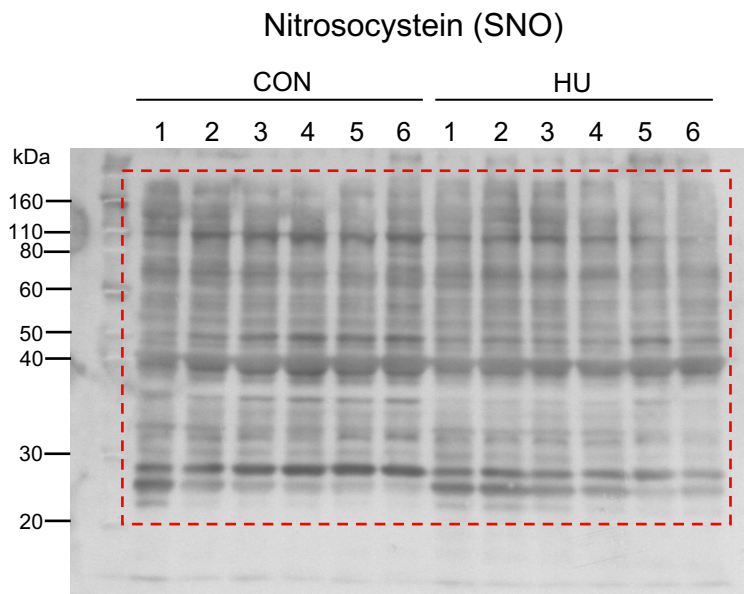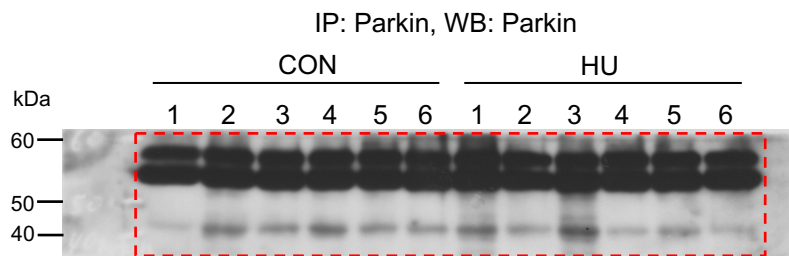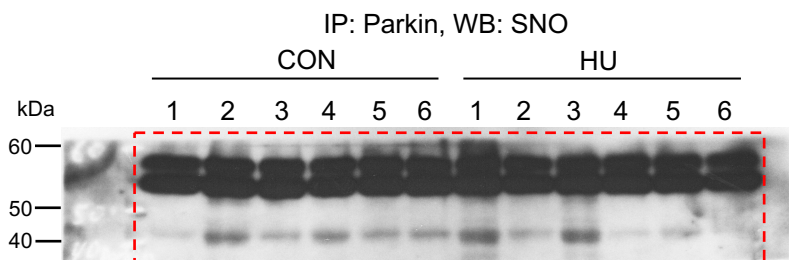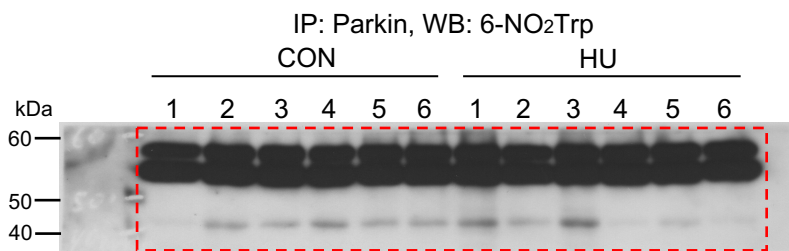

S1\_raw\_images. Original uncropped blots used in Fig. 5A and C.

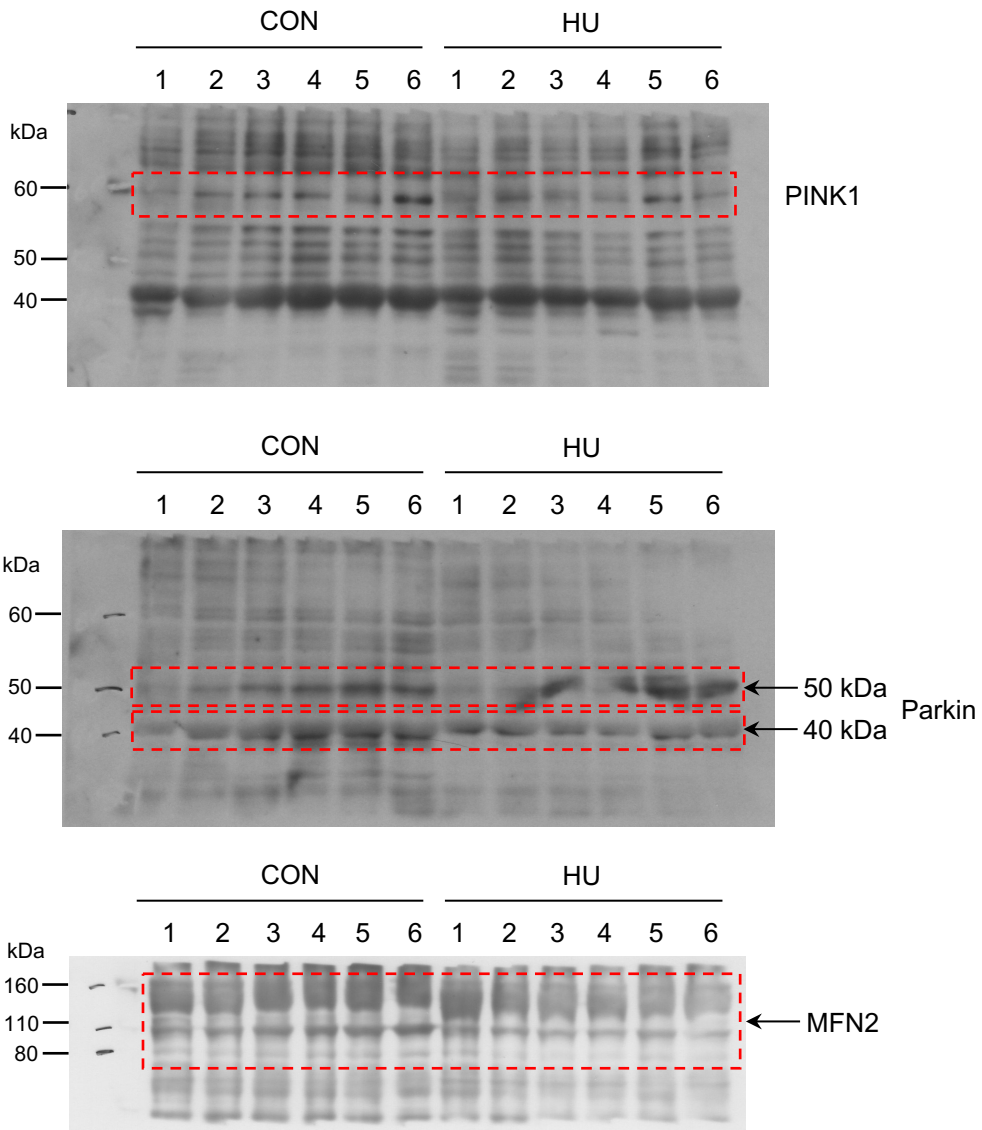

S1\_raw\_images. Original uncropped blots used in Fig. 6A.

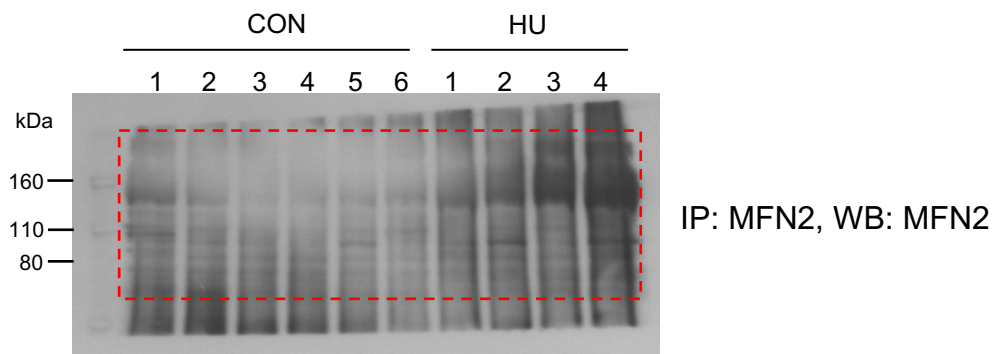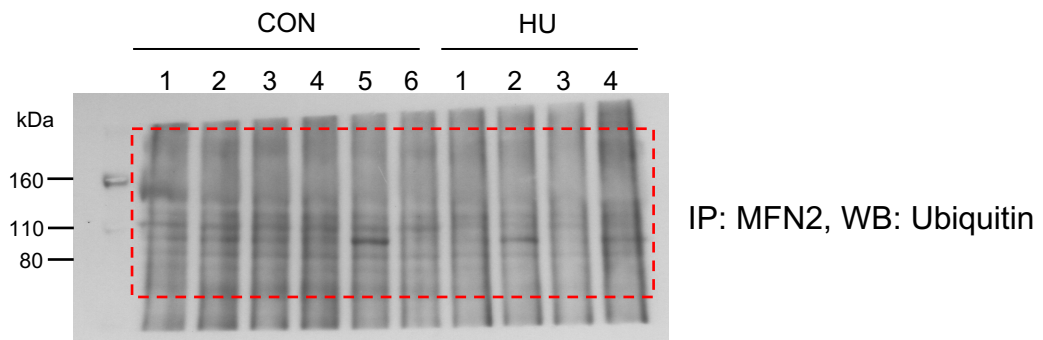

S1\_raw\_images. Original uncropped blots used in Fig. 7A.
